# Supplementary material for: BinSanity: unsupervised clustering of environmental microbial assemblies using coverage and affinity propagation
Source: PeerJ. 2017 Mar 8;5:e3035. doi: 10.7717/peerj.3035 (PMC5345454; doi:10.7717/peerj.3035)
Supplement: Table S2 [file peerj-05-3035-s004.xlsx]

## Sheet: Sheet1
Table 3.1 CheckM results for BinSanity+refinement on the strain mixture
Bin Id	Marker lineage	No. of genomes	No. of markers	No. of marker sets	0	1	2	3	4	5+	Completeness	Contamination/Redundancy	Strain heterogeneity
metagenome-strain-edit-bin_7	p__Euryarchaeota (UID49)	95	228	153	0	225	3	0	0	0	100	1.96	0
metagenome-strain-edit-bin_4	c__Deltaproteobacteria (UID3216)	83	247	155	1	242	4	0	0	0	99.35	2.1	0
metagenome-strain-edit-bin_25	p__Euryarchaeota (UID49)	95	228	153	2	223	3	0	0	0	99.18	1.36	0
metagenome-strain-edit-bin_12	p__Euryarchaeota (UID3)	148	188	125	2	178	8	0	0	0	99.14	4.62	0
metagenome-strain-edit-bin_23	c__Clostridia (UID1085)	35	420	196	4	410	6	0	0	0	99.1	1.66	0
metagenome-strain-edit-bin_9	p__Cyanobacteria (UID2143)	129	472	368	4	440	28	0	0	0	99.05	6.49	0
metagenome-strain-edit-bin_28	c__Gammaproteobacteria (UID4761)	52	693	297	5	675	13	0	0	0	98.93	1.87	0
metagenome-strain-edit-bin_6	f__Halobacteriaceae (UID85)	51	395	250	5	384	6	0	0	0	98.8	2.07	0
metagenome-strain-edit-bin_5	o__Lactobacillales (UID462)	85	367	162	3	353	11	0	0	0	98.46	4.55	0
metagenome-strain-edit-bin_27	c__Gammaproteobacteria (UID4444)	263	506	232	6	489	11	0	0	0	98.37	2.07	0
metagenome-strain-edit-bin_10	f__Rhodobacteraceae (UID3360)	56	582	313	8	566	8	0	0	0	98.34	1.55	0
metagenome-strain-edit-bin_18	c__Thermoprotei (UID148)	41	245	158	4	234	7	0	0	0	98.34	3.27	0
pass1-refine-bin_3	f__Enterobacteriaceae (UID5124)	134	1173	336	36	1093	43	1	0	0	98.3	4.62	6.52
metagenome-strain-edit-bin_3	p__Euryarchaeota (UID3)	148	186	123	3	179	4	0	0	0	97.97	1.01	0
metagenome-strain-edit-bin_24	f__Enterobacteriaceae (UID5124)	134	1173	336	42	1119	12	0	0	0	97.96	1.13	0
metagenome-strain-edit-bin_19	p__Bacteroidetes (UID2605)	350	314	208	6	298	10	0	0	0	97.36	2.7	0
metagenome-strain-edit-bin_11	o__Lactobacillales (UID374)	471	341	187	8	320	13	0	0	0	96.88	2.92	0
metagenome-strain-edit-bin_26	f__Halobacteriaceae (UID96)	40	417	263	11	390	16	0	0	0	96.84	3.27	0
metagenome-strain-edit-bin_8	c__Deltaproteobacteria (UID3216)	83	247	155	10	231	6	0	0	0	96.79	2.78	0
pass1-refine-bin_0	f__Enterobacteriaceae (UID5124)	134	1168	336	90	1062	16	0	0	0	96.35	1.39	0
metagenome-strain-edit-bin_2	p__Euryarchaeota (UID3)	148	186	123	7	171	8	0	0	0	95.89	5.35	0
metagenome-strain-edit-bin_20	o__Clostridiales (UID1120)	304	249	142	10	234	5	0	0	0	95.48	2.02	0
pass1-refine-bin_4	k__Bacteria (UID203)	5449	104	58	7	38	20	11	1	27	91.38	68.39	99.5
pass1-refine-bin_2	k__Bacteria (UID203)	5449	104	58	30	50	24	0	0	0	84.64	13.79	95.83
pass1-refine-bin_1	k__Bacteria (UID203)	5449	104	58	57	40	7	0	0	0	68.97	8.62	100
unbinned	root (UID1)	5656	56	24	56	0	0	0	0	0	0	0	0

## Sheet: Sheet2
Table 3.2 Raw percentages of contigs from reference organisms in each clustered bin for BinSanity
100.0 % of contigs in metagenome-strain-edit-bin_26.fna are from NZ_CP011947_Haloferax_gibbonsii_strain_ARA6_edit.fna
100.0 % of contigs in metagenome-strain-edit-bin_24.fna are from NZ_CP007025_Escherichia_albertii_KF1_edit.fna
100.0 % of contigs in metagenome-strain-edit-bin_23.fna are from NC_018867_1_Dehalobacter_sp_CF_edit.fna
100.0 % of contigs in metagenome-strain-edit-bin_4.fna are from NC_002939_5_Geobacter_sulfurreducens_PCA_chromosome_edit.fna
100.0 % of contigs in metagenome-strain-edit-bin_27.fna are from NZ_CP013106_1_Halamonas_haungheensis_Strain_BJGMM_B45_edit.fna
100.0 % of contigs in metagenome-strain-edit-bin_12.fna are from NC_009515_Methanobrevibacter_smithii_ATCC_35061_edit.fna
100.0 % of contigs in metagenome-strain-edit-bin_3.fna are from NC_002689_Thermoplasma_volcanium_GSS1_DNA_edit.fna
98.275862069 % of contigs in pass1-refine-bin_2.fna are from NC_017634_Escherichia_coli_O83H1_edit.fna
1.72413793103 % of contigs in pass1-refine-bin_2.fna are from NC_011740_Escherichia_fergusonii_ATCC_edit.fna
100.0 % of contigs in metagenome-strain-edit-bin_7.fna are from NC_007355_Methanosarcina_barkeri_str_Fusaro_edit.fna
0.516795865633 % of contigs in metagenome-strain-edit-bin_9.fna are from NC_017634_Escherichia_coli_O83H1_edit.fna
99.4832041344 % of contigs in metagenome-strain-edit-bin_9.fna are from NC_007604_Synechococcus_elongatus_PCC_7942_edit.fna
100.0 % of contigs in metagenome-strain-edit-bin_11.fna are from NC_008528_Oenococcus_oeni_PSU-1_edit.fna
100.0 % of contigs in metagenome-strain-edit-bin_18.fna are from NC_018001_Desulfurococcus_fermentans_DSM_16532_edit.fna
100.0 % of contigs in metagenome-strain-edit-bin_8.fna are from NC_007517_Geobacter_metallireducens_GS-15_edit.fna
100.0 % of contigs in metagenome-strain-edit-bin_19.fna are from NC_018011_1_Alistipes_finegoldii_DSM_17242_edit.fna
100.0 % of contigs in metagenome-strain-edit-bin_28.fna are from NZ_CP013120_Alteromonas_stellipolaris_LMG_21856_edit.fna
100.0 % of contigs in metagenome-strain-edit-bin_20.fna are from NC_018657_1_Clostridium_acidurici_9a_plasmid_pCuri3_edit.fna
100.0 % of contigs in metagenome-strain-edit-bin_6.fna are from NC_006396_Haloarcula_marismortui_ATCC_43049_edit.fna
81.4903846154 % of contigs in pass1-refine-bin_4.fna are from NC_018658_Escherichia_coli_0104_H4_edit.fna
0.240384615385 % of contigs in pass1-refine-bin_4.fna are from NZ_CP007025_Escherichia_albertii_KF1_edit.fna
4.08653846154 % of contigs in pass1-refine-bin_4.fna are from NC_017634_Escherichia_coli_O83H1_edit.fna
0.721153846154 % of contigs in pass1-refine-bin_4.fna are from NC_000913_Escherichia_coli_str_K-12_edit.fna
0.961538461538 % of contigs in pass1-refine-bin_4.fna are from NC_011740_Escherichia_fergusonii_ATCC_edit.fna
0.240384615385 % of contigs in pass1-refine-bin_4.fna are from NC_008528_Oenococcus_oeni_PSU-1_edit.fna
12.2596153846 % of contigs in pass1-refine-bin_4.fna are from NC_011751_Escherichia_coli_UMN026_edit.fna
100.0 % of contigs in metagenome-strain-edit-bin_10.fna are from NC_008209_Roseobacter_denitrificans_OCh_114_edit.fna
10.781671159 % of contigs in metagenome-strain-edit-bin_5.fna are from NC_000913_Escherichia_coli_str_K-12_edit.fna
89.218328841 % of contigs in metagenome-strain-edit-bin_5.fna are from NC_004567_Lactobacillus_plantarum_WCFS1_edit.fna
0.337268128162 % of contigs in metagenome-strain-edit-bin_25.fna are from NC_007517_Geobacter_metallireducens_GS-15_edit.fna
99.6627318718 % of contigs in metagenome-strain-edit-bin_25.fna are from NZ_CP009506_Methanosarcina_siciliae_T4M_edit.fna
100.0 % of contigs in pass1-refine-bin_0.fna are from NC_011740_Escherichia_fergusonii_ATCC_edit.fna
93.085106383 % of contigs in metagenome-strain-edit-bin_2.fna are from NC_002578_Thermoplasma_acidophilum_DSM_1728_edit.fna
6.91489361702 % of contigs in metagenome-strain-edit-bin_2.fna are from NC_011751_Escherichia_coli_UMN026_edit.fna
99.4388327722 % of contigs in pass1-refine-bin_3.fna are from NC_000913_Escherichia_coli_str_K-12_edit.fna
0.561167227834 % of contigs in pass1-refine-bin_3.fna are from NC_011751_Escherichia_coli_UMN026_edit.fna
28.3707865169 % of contigs in pass1-refine-bin_1.fna are from NC_018658_Escherichia_coli_0104_H4_edit.fna
0.842696629213 % of contigs in pass1-refine-bin_1.fna are from NC_017634_Escherichia_coli_O83H1_edit.fna
70.7865168539 % of contigs in pass1-refine-bin_1.fna are from NC_011751_Escherichia_coli_UMN026_edit.fna
100.0 % of contigs from NZ_CP011947_Haloferax_gibbonsii_strain_ARA6_edit.fna are in metagenome-strain-edit-bin_26.fna
77.0454545455 % of contigs from NC_018658_Escherichia_coli_0104_H4_edit.fna are in pass1-refine-bin_4.fna
22.9545454545 % of contigs from NC_018658_Escherichia_coli_0104_H4_edit.fna are in pass1-refine-bin_1.fna
99.5762711864 % of contigs from NZ_CP007025_Escherichia_albertii_KF1_edit.fna are in metagenome-strain-edit-bin_24.fna
0.423728813559 % of contigs from NZ_CP007025_Escherichia_albertii_KF1_edit.fna are in pass1-refine-bin_4.fna
100.0 % of contigs from NC_018001_Desulfurococcus_fermentans_DSM_16532_edit.fna are in metagenome-strain-edit-bin_18.fna
99.5 % of contigs from NC_007517_Geobacter_metallireducens_GS-15_edit.fna are in metagenome-strain-edit-bin_8.fna
0.5 % of contigs from NC_007517_Geobacter_metallireducens_GS-15_edit.fna are in metagenome-strain-edit-bin_25.fna
95.9595959596 % of contigs from NC_017634_Escherichia_coli_O83H1_edit.fna are in pass1-refine-bin_2.fna
0.673400673401 % of contigs from NC_017634_Escherichia_coli_O83H1_edit.fna are in metagenome-strain-edit-bin_9.fna
2.86195286195 % of contigs from NC_017634_Escherichia_coli_O83H1_edit.fna are in pass1-refine-bin_4.fna
0.505050505051 % of contigs from NC_017634_Escherichia_coli_O83H1_edit.fna are in pass1-refine-bin_1.fna
100.0 % of contigs from NC_018011_1_Alistipes_finegoldii_DSM_17242_edit.fna are in metagenome-strain-edit-bin_19.fna
100.0 % of contigs from NC_018657_1_Clostridium_acidurici_9a_plasmid_pCuri3_edit.fna are in metagenome-strain-edit-bin_20.fna
0.32292787944 % of contigs from NC_000913_Escherichia_coli_str_K-12_edit.fna are in pass1-refine-bin_4.fna
4.3057050592 % of contigs from NC_000913_Escherichia_coli_str_K-12_edit.fna are in metagenome-strain-edit-bin_5.fna
95.3713670614 % of contigs from NC_000913_Escherichia_coli_str_K-12_edit.fna are in pass1-refine-bin_3.fna
100.0 % of contigs from NZ_CP013106_1_Halamonas_haungheensis_Strain_BJGMM_B45_edit.fna are in metagenome-strain-edit-bin_27.fna
100.0 % of contigs from NZ_CP013120_Alteromonas_stellipolaris_LMG_21856_edit.fna are in metagenome-strain-edit-bin_28.fna
2.17864923747 % of contigs from NC_011740_Escherichia_fergusonii_ATCC_edit.fna are in pass1-refine-bin_2.fna
0.871459694989 % of contigs from NC_011740_Escherichia_fergusonii_ATCC_edit.fna are in pass1-refine-bin_4.fna
96.9498910675 % of contigs from NC_011740_Escherichia_fergusonii_ATCC_edit.fna are in pass1-refine-bin_0.fna
99.8324958124 % of contigs from NC_008528_Oenococcus_oeni_PSU-1_edit.fna are in metagenome-strain-edit-bin_11.fna
0.167504187605 % of contigs from NC_008528_Oenococcus_oeni_PSU-1_edit.fna are in pass1-refine-bin_4.fna
100.0 % of contigs from NC_008209_Roseobacter_denitrificans_OCh_114_edit.fna are in metagenome-strain-edit-bin_10.fna
100.0 % of contigs from NZ_CP009506_Methanosarcina_siciliae_T4M_edit.fna are in metagenome-strain-edit-bin_25.fna
100.0 % of contigs from NC_007355_Methanosarcina_barkeri_str_Fusaro_edit.fna are in metagenome-strain-edit-bin_7.fna
100.0 % of contigs from NC_002689_Thermoplasma_volcanium_GSS1_DNA_edit.fna are in metagenome-strain-edit-bin_3.fna
100.0 % of contigs from NC_002578_Thermoplasma_acidophilum_DSM_1728_edit.fna are in metagenome-strain-edit-bin_2.fna
100.0 % of contigs from NC_004567_Lactobacillus_plantarum_WCFS1_edit.fna are in metagenome-strain-edit-bin_5.fna
100.0 % of contigs from NC_007604_Synechococcus_elongatus_PCC_7942_edit.fna are in metagenome-strain-edit-bin_9.fna
100.0 % of contigs from NC_002939_5_Geobacter_sulfurreducens_PCA_chromosome_edit.fna are in metagenome-strain-edit-bin_4.fna
100.0 % of contigs from NC_018867_1_Dehalobacter_sp_CF_edit.fna are in metagenome-strain-edit-bin_23.fna
100.0 % of contigs from NC_006396_Haloarcula_marismortui_ATCC_43049_edit.fna are in metagenome-strain-edit-bin_6.fna
100.0 % of contigs from NC_009515_Methanobrevibacter_smithii_ATCC_35061_edit.fna are in metagenome-strain-edit-bin_12.fna
14.6974063401 % of contigs from NC_011751_Escherichia_coli_UMN026_edit.fna are in pass1-refine-bin_4.fna
11.2391930836 % of contigs from NC_011751_Escherichia_coli_UMN026_edit.fna are in metagenome-strain-edit-bin_2.fna
1.4409221902 % of contigs from NC_011751_Escherichia_coli_UMN026_edit.fna are in pass1-refine-bin_3.fna
72.6224783862 % of contigs from NC_011751_Escherichia_coli_UMN026_edit.fna are in pass1-refine-bin_1.fna
